# Supplementary material for: Concise synthesis of deuterium-labelled proanthocyanidin metabolite 5-(3′,4′-dihydroxyphenyl)-γ-valerolactone as an analytical tool
Source: Royal Society of Chemistry journal article supplement (doi:10.1039/d3ra08665h), 2024-01-01
Supplement: d3ra08665h1.pdf [file d3ra08665h1.pdf]

*Electronic Supplementary Information*

**Concise synthesis of deuterium-labelled proanthocyanidins metabolite  
5-(3',4'-dihydroxyphenyl)- $\gamma$ -valerolactone as analytical tool**

Angelica Artasensi<sup>a</sup>, Sarah Mazzotta<sup>b</sup>, Giovanna Baron<sup>a</sup>, Giancarlo Aldini<sup>a</sup>, Laura Fumagalli<sup>a\*</sup>

<sup>a</sup>Department of Pharmaceutical Sciences, University of Milan, 20133 Milan, Italy.

<sup>b</sup>Department of Chemistry, University of Milan, 20133 Milan, Italy.

\*Corresponding author.

# NMR spectra

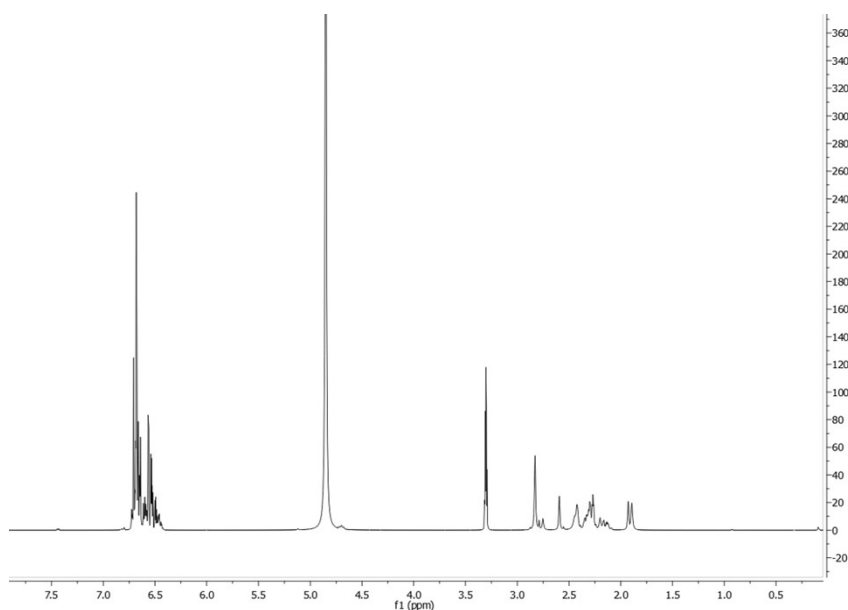

Figure 1  $^1\text{H}$  spectrum of compound 6.

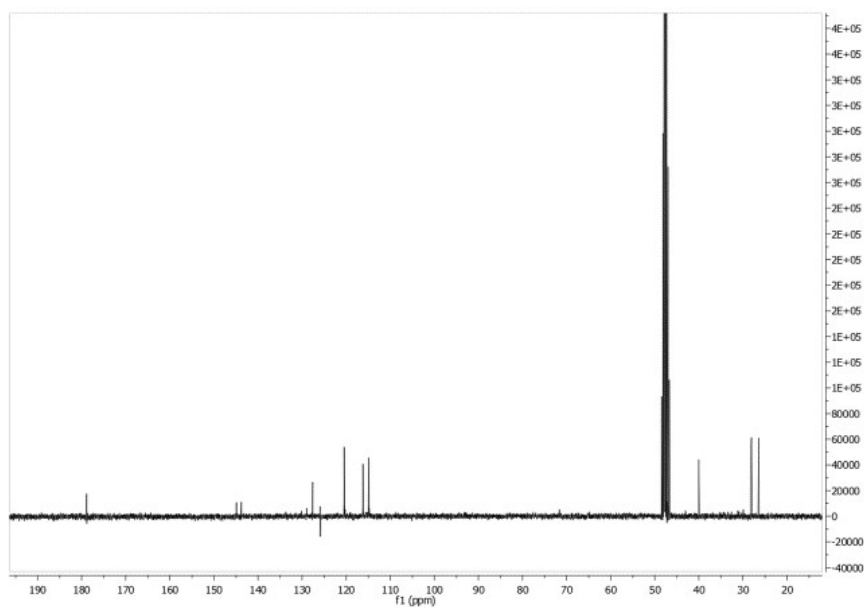

Figure 2  $^{13}\text{C}$  spectrum of compound 6.

Calibration curve

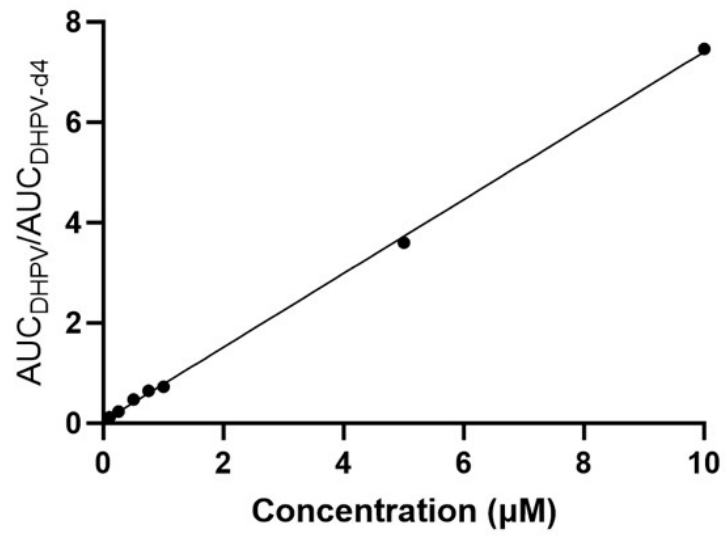

Figure 3 Calibration curve obtained by plotting the nominal DHPV concentration (x-axis) versus the ratio of peak area of DHPV/peak area of DHPV- $d_4$
